# Supplementary material for: Quinoline–hydrazone hybrids as dual mutant EGFR inhibitors with promising metallic nanoparticle loading: rationalized design, synthesis, biological investigation and computational studies
Source: Royal Society of Chemistry journal article supplement (doi:10.1039/d2nj02962f), 2022-01-01
Supplement: d2nj02962f1.pdf [file d2nj02962f1.pdf]

## Supplementary information

| Figures                                                                                                                                                                                                                        | Page №. |
|--------------------------------------------------------------------------------------------------------------------------------------------------------------------------------------------------------------------------------|---------|
| Figure S1. Superimposing the co-crystallized (green sticks) and redocked (yellow sticks) ligands at (A) EGFR <sup>WT</sup> ; (B) EGFR <sup>T790M</sup> ; (C) EGFR <sup>L858R</sup> for validating the adopted docking protocol | 2       |
| Figure S2. <sup>1</sup> H NMR of Compound 3                                                                                                                                                                                    | 3       |
| Figure S3. <sup>1</sup> H NMR of Compound 4                                                                                                                                                                                    | 4       |
| Figure S4. <sup>13</sup> C NMR of Compound 4                                                                                                                                                                                   | 5       |
| Figure S5. <sup>1</sup> H NMR of Compound 5                                                                                                                                                                                    | 6       |
| Figure S6. <sup>13</sup> C NMR of Compound 5                                                                                                                                                                                   | 7       |
| Figure S7. <sup>1</sup> H NMR of Compound 6                                                                                                                                                                                    | 8       |
| Figure S8. <sup>13</sup> C NMR of Compound 6                                                                                                                                                                                   | 9       |
| Figure S9. <sup>1</sup> H NMR of Compound 7                                                                                                                                                                                    | 10      |
| Figure S10. <sup>13</sup> C NMR of Compound 7                                                                                                                                                                                  | 11      |
| Figure S11. <sup>1</sup> H NMR of Compound 9                                                                                                                                                                                   | 12      |
| Figure S12. <sup>13</sup> C NMR of Compound 9                                                                                                                                                                                  | 13      |
| Figure S13. <sup>1</sup> H NMR of Compound 11                                                                                                                                                                                  | 14      |
| Figure S14. <sup>13</sup> C NMR of Compound 11                                                                                                                                                                                 | 15      |
| Figure S15. <sup>1</sup> H NMR of Compound 13                                                                                                                                                                                  | 16      |
| Figure S16. <sup>13</sup> C NMR of Compound 13                                                                                                                                                                                 | 17      |
| Figure S17. <sup>1</sup> H NMR of Compound 14                                                                                                                                                                                  | 18      |
| Figure S18. <sup>13</sup> C NMR of Compound 14                                                                                                                                                                                 | 19      |
| Figure S19. <sup>1</sup> H NMR of Compound 15                                                                                                                                                                                  | 20      |
| Figure S20. <sup>13</sup> C NMR of Compound 15                                                                                                                                                                                 | 21      |
| Figure S21. Western blotting images for the tested proteins                                                                                                                                                                    | 22      |

| Tables                                                                                                                                    | Page №. |
|-------------------------------------------------------------------------------------------------------------------------------------------|---------|
| Table S1. MM/GBSA binding energies and per-residue energy contributions for the hotspot EGFR amino acids based on FastDRH server analysis | 22      |

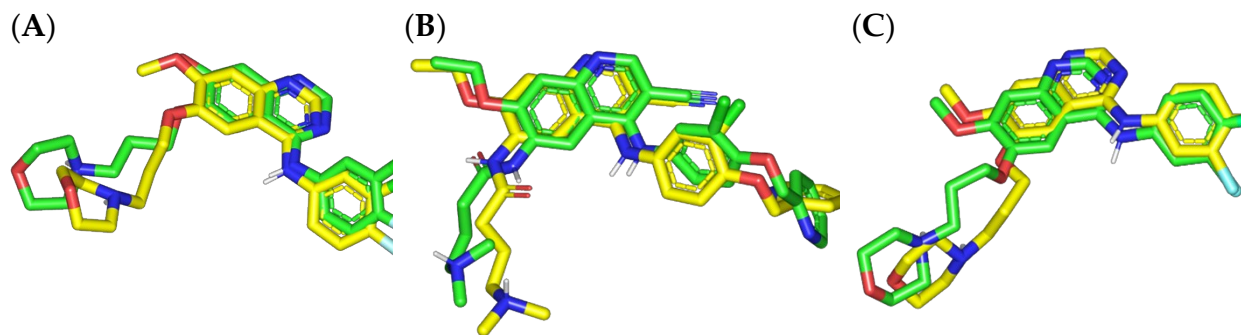

**Figure S1.** Superimposing the co-crystallized (green sticks) and redocked (yellow sticks) ligands at (A) EGFR<sup>WT</sup>; (B) EGFR<sup>T790M</sup>; (C) EGFR<sup>L858R</sup> for validating the adopted docking protocol.

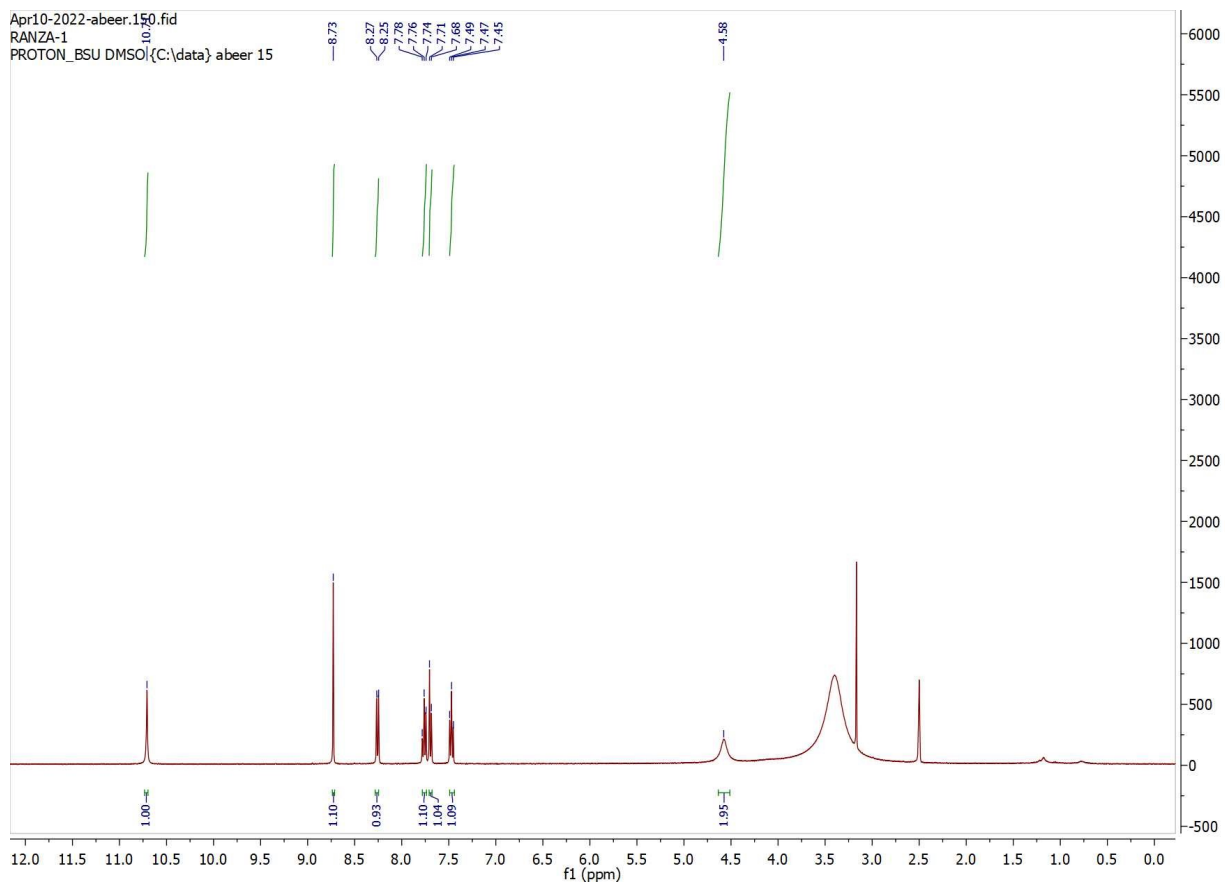

Figure 2.  $^1\text{H}$  NMR of Compound 3

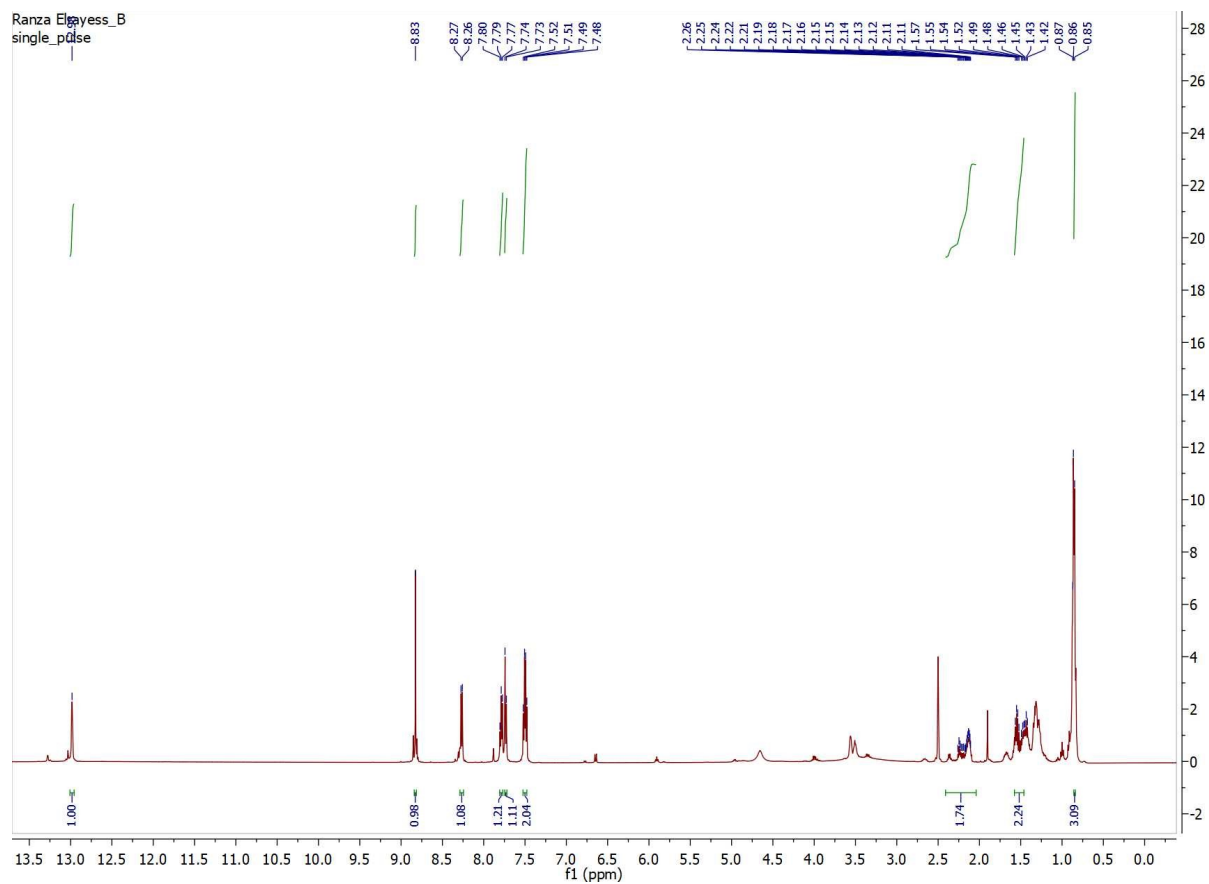

Figure 3.  $^1\text{H}$  NMR of Compound 4

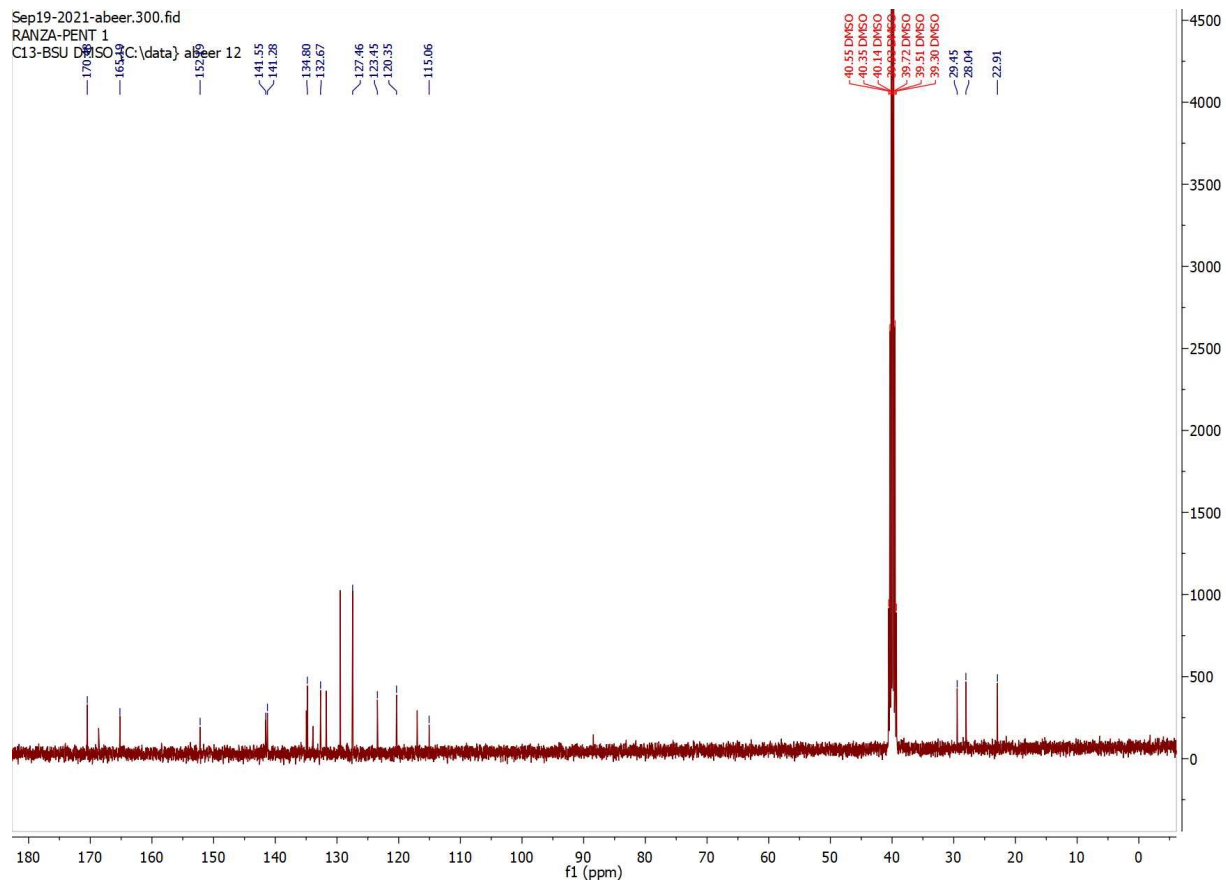

Figure 4.  $^{13}\text{C}$  NMR of Compound 4

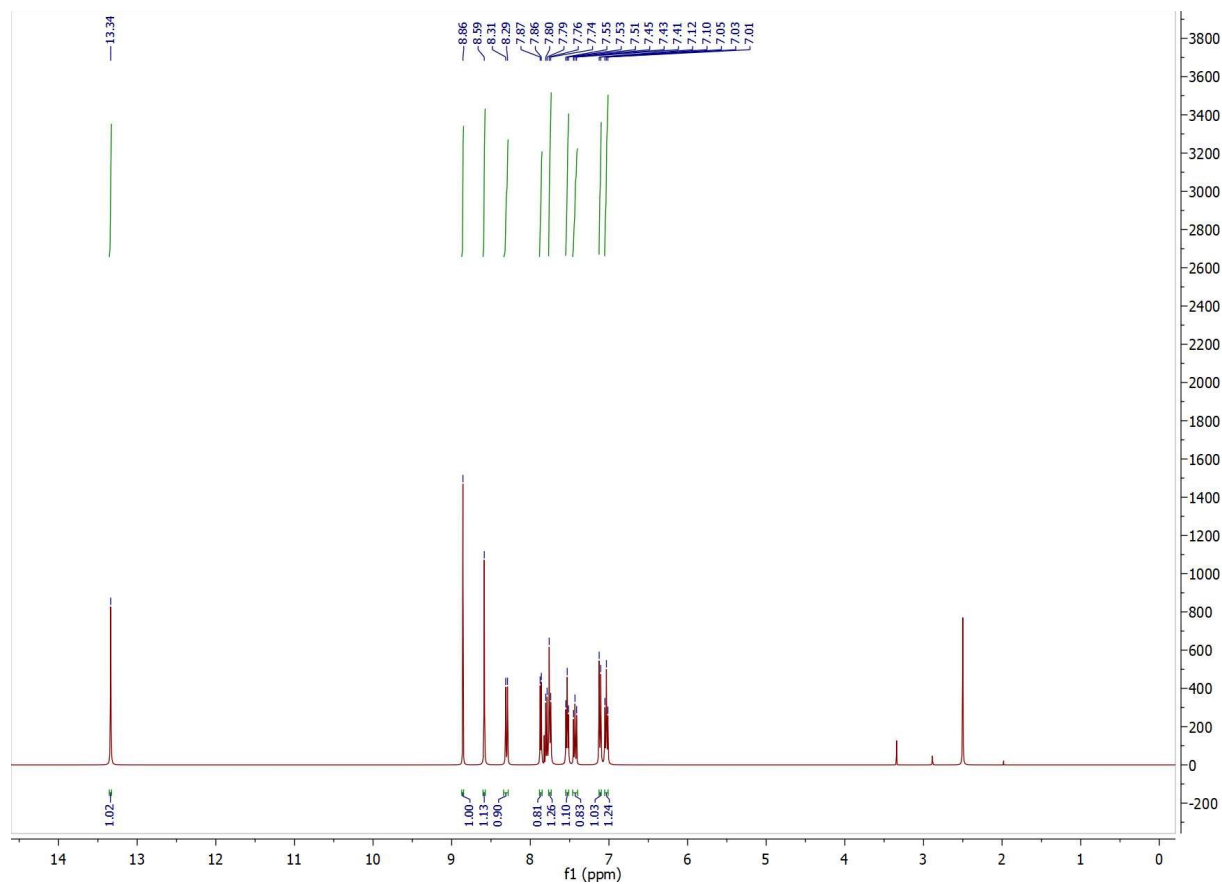

Figure 5.  $^1\text{H}$  NMR of Compound 5

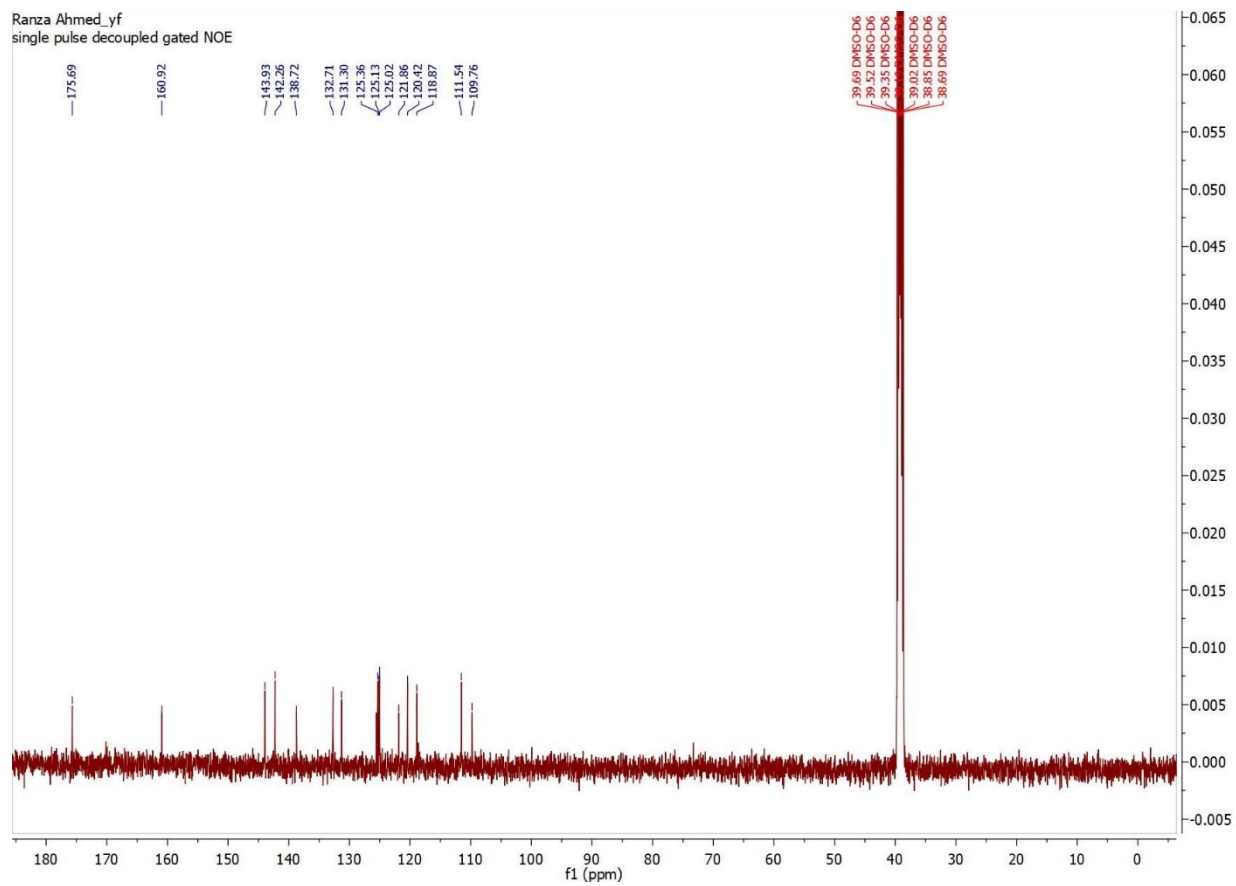

Figure 6.  $^{13}\text{C}$  NMR of Compound 5

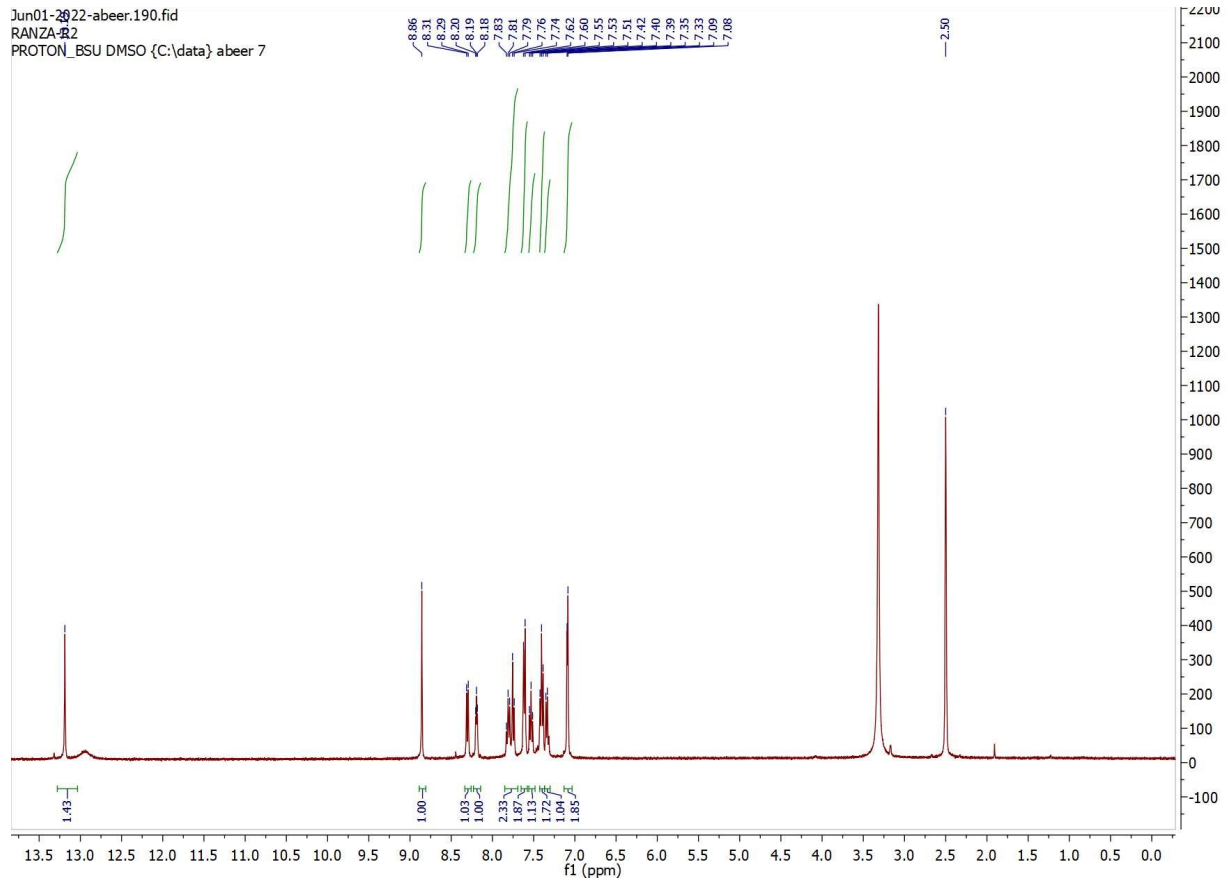

Figure 7.  $^1\text{H}$  NMR of Compound 6



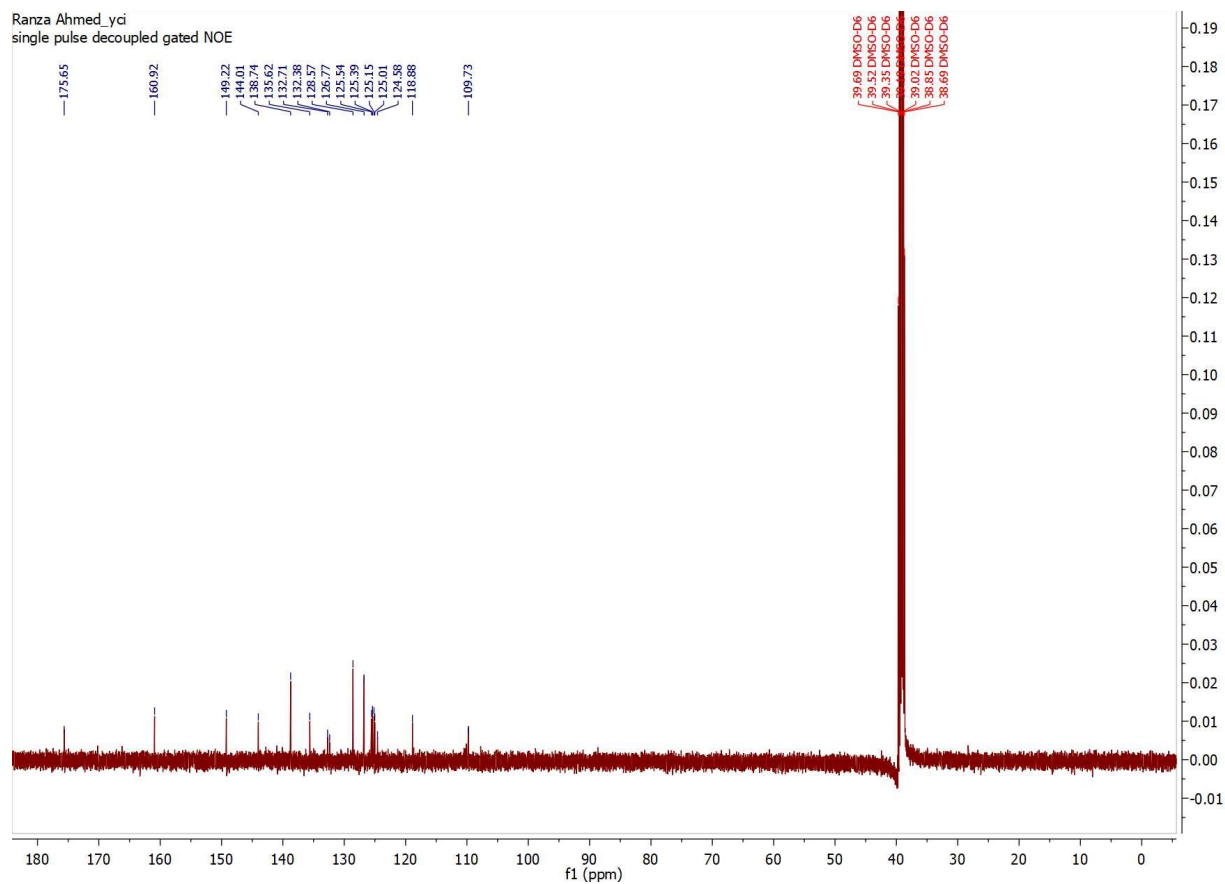

Figure 8. <sup>13</sup>C NMR of Compound 6

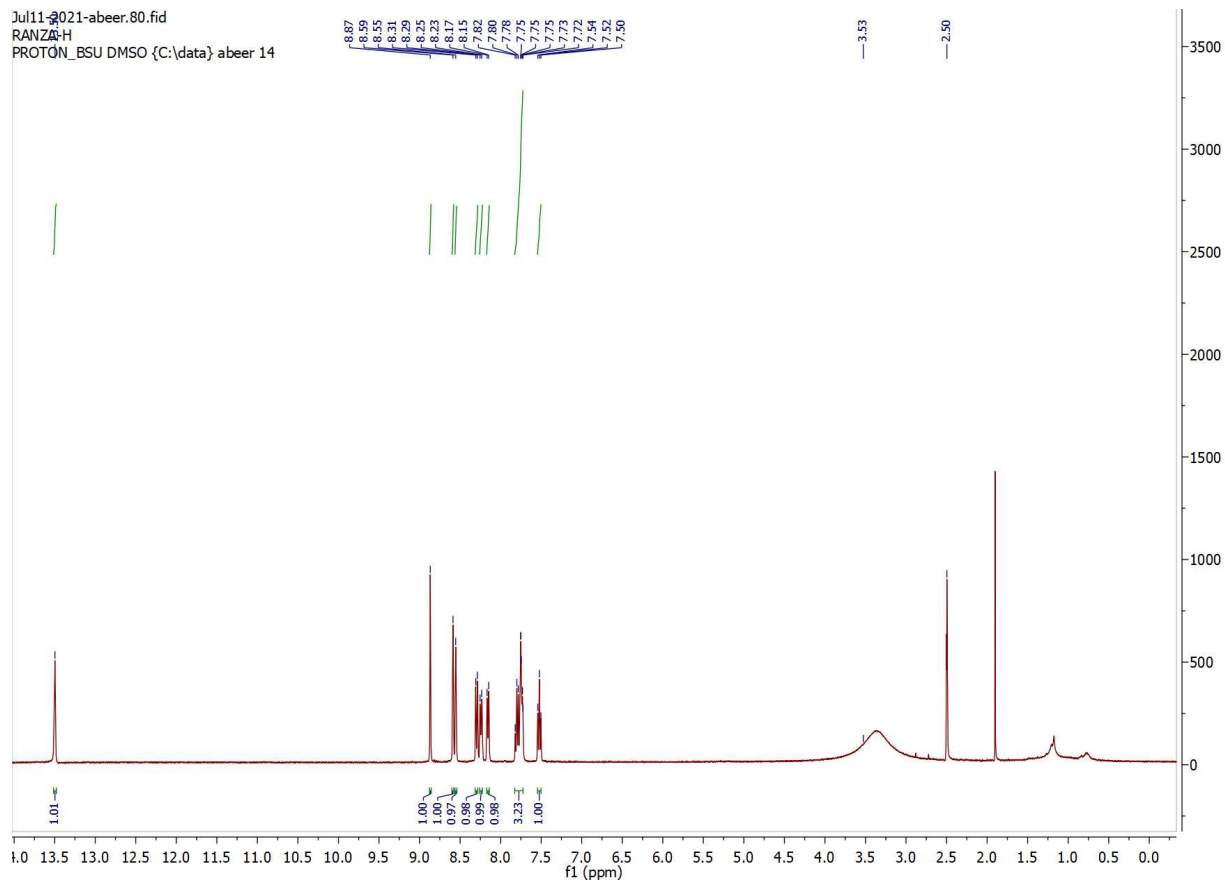

Figure 9.  $^1\text{H}$  NMR of Compound 7

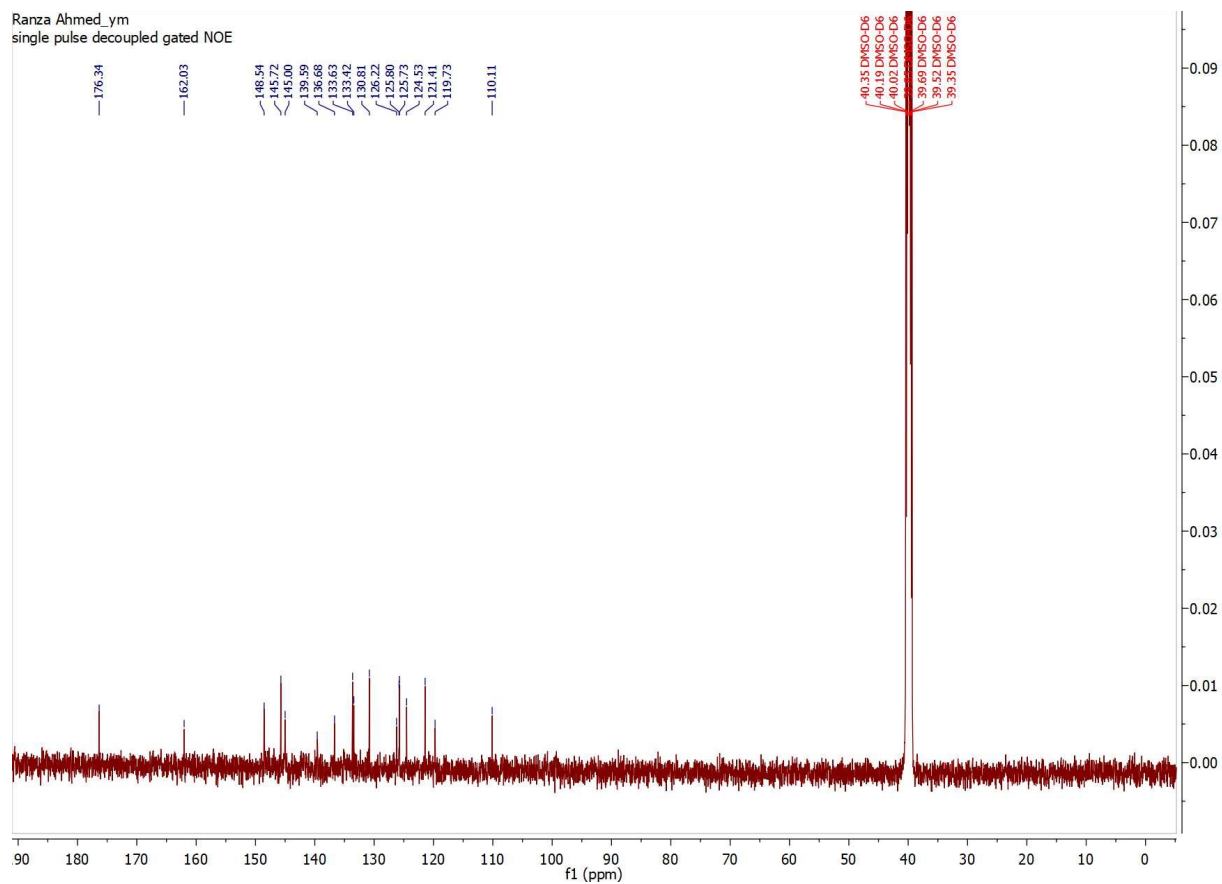

Figure 10.  $^{13}\text{C}$  NMR of Compound 7

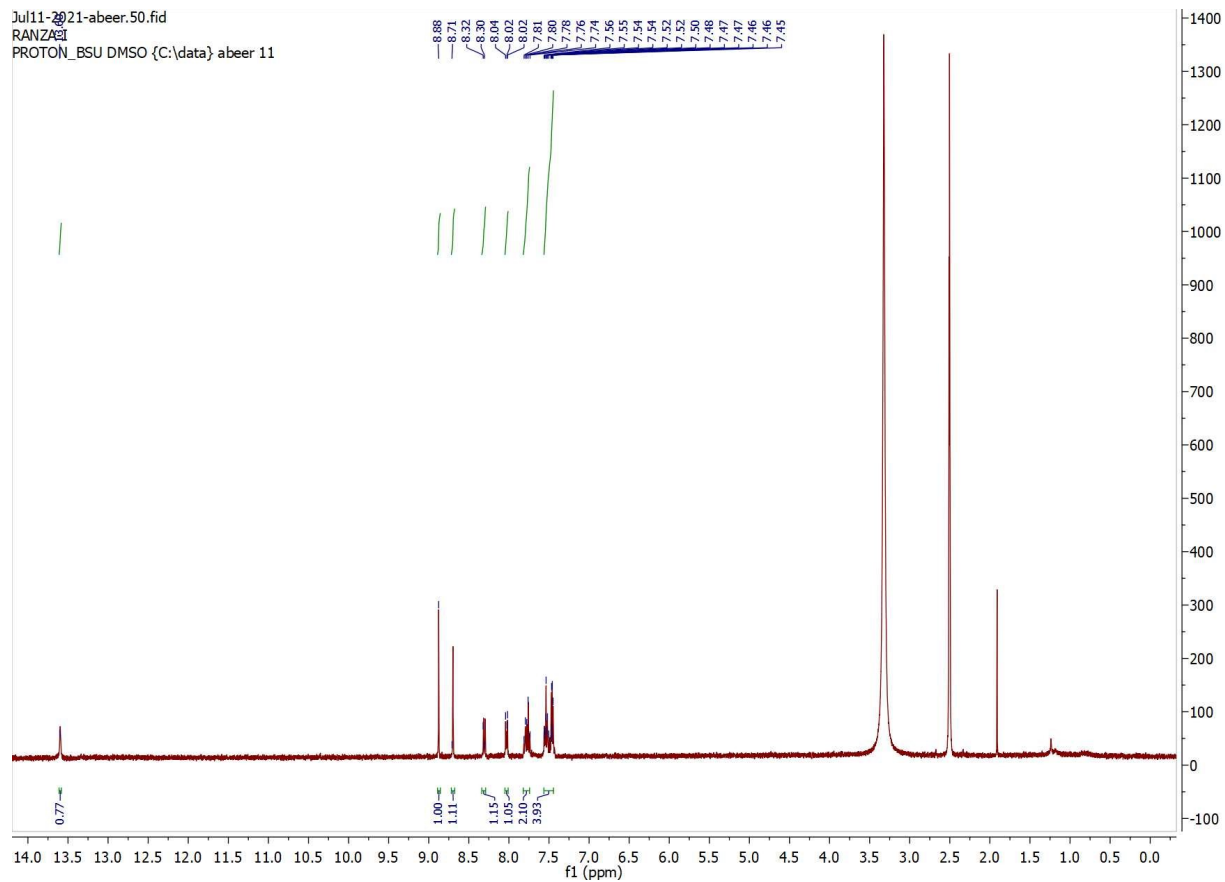

Figure 11.  $^1\text{H}$  NMR of Compound 9

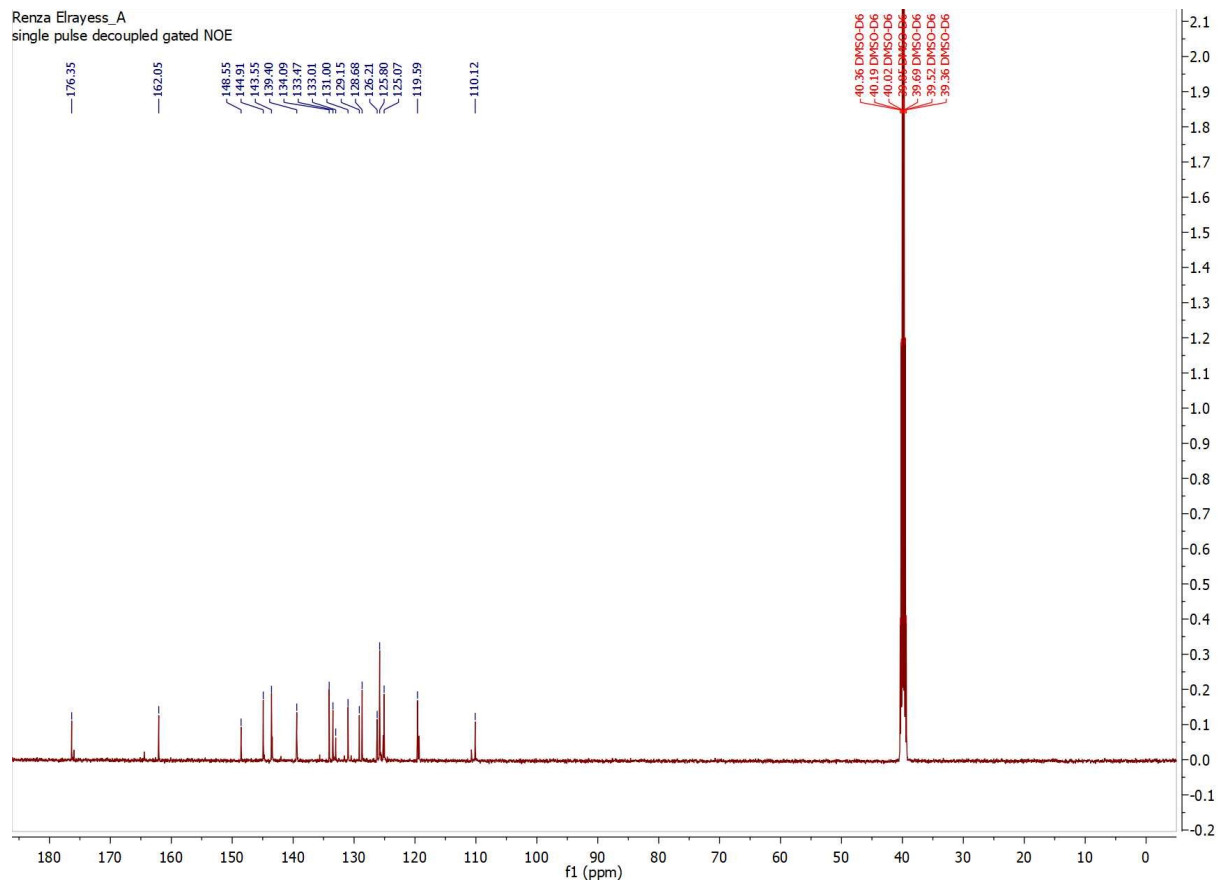

Figure 12.  $^{13}\text{C}$  NMR of Compound 9

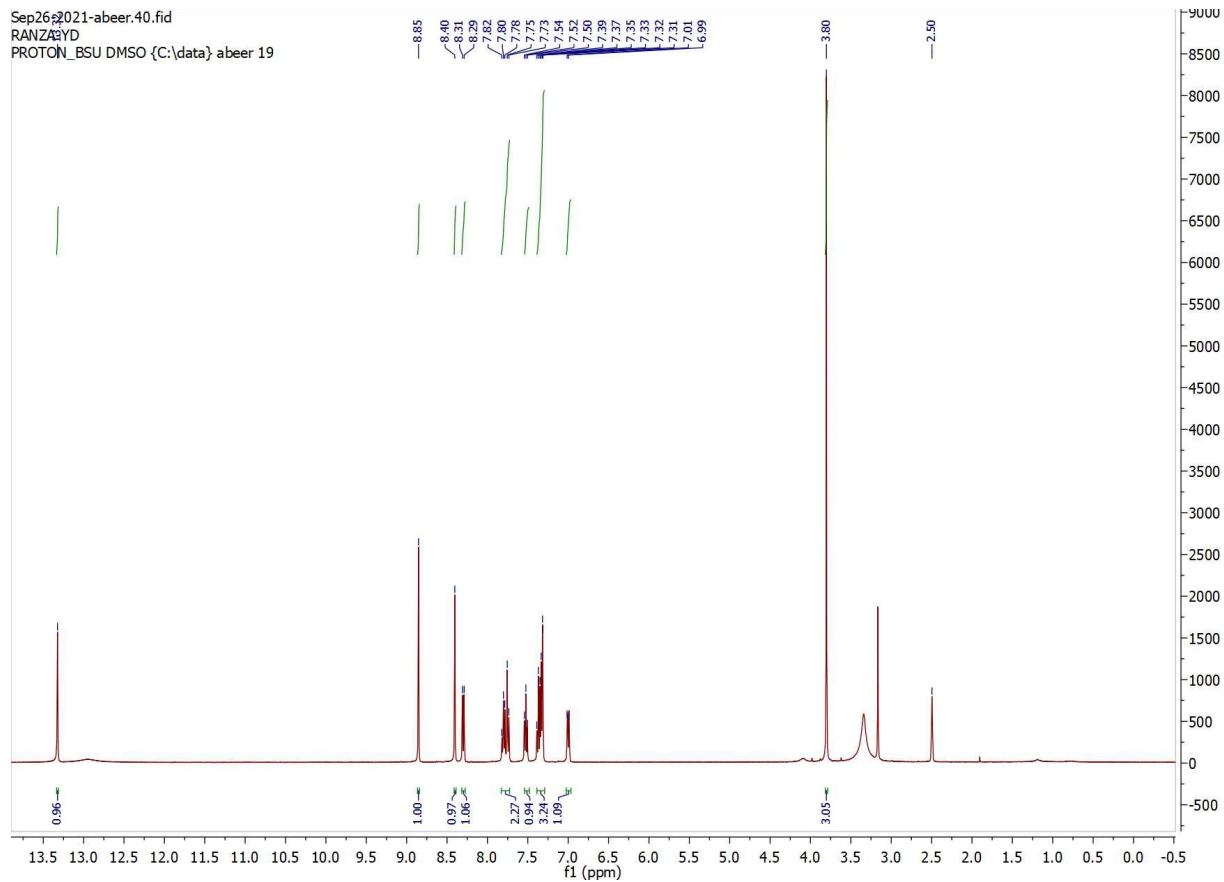

Figure 13.  $^1\text{H}$  NMR of Compound 11

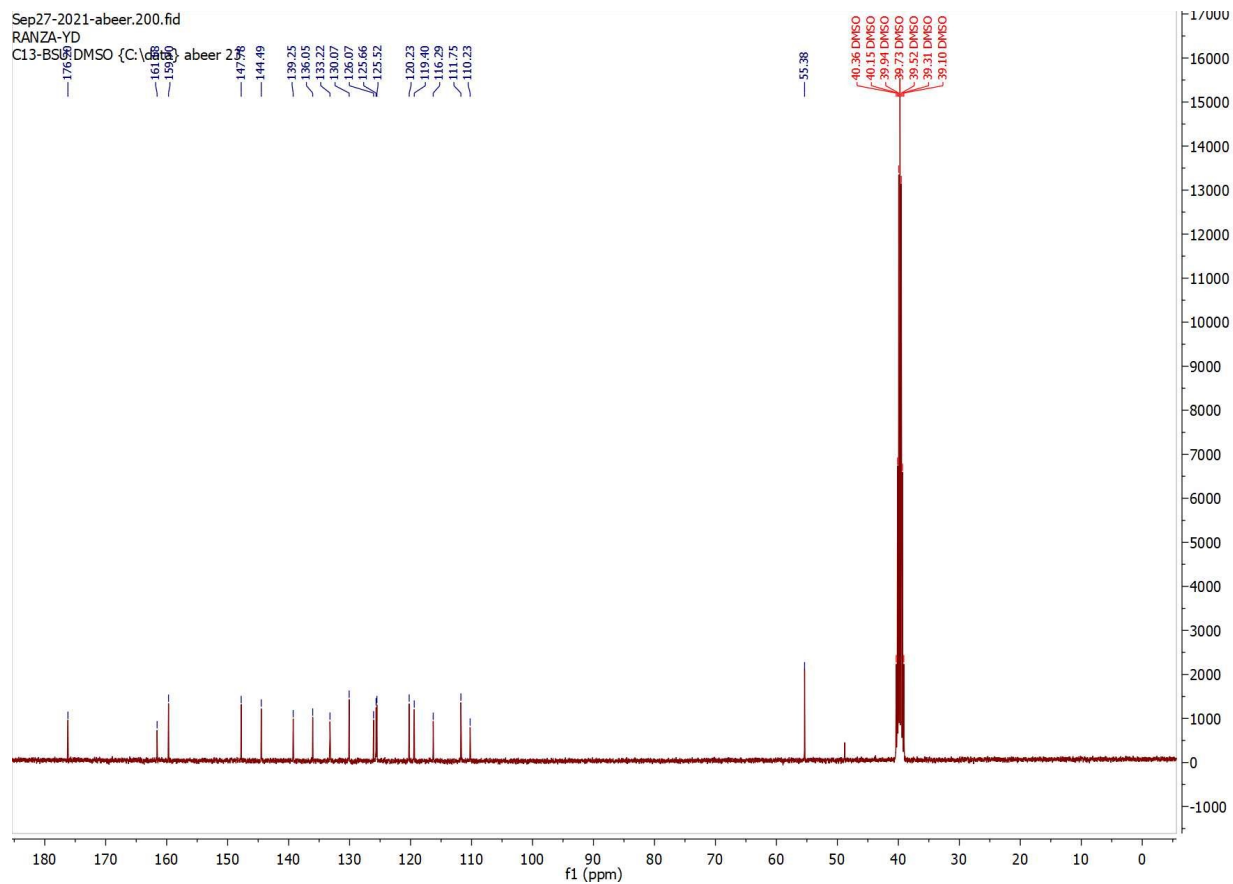

Figure 14.  $^{13}\text{C}$  NMR of Compound 11

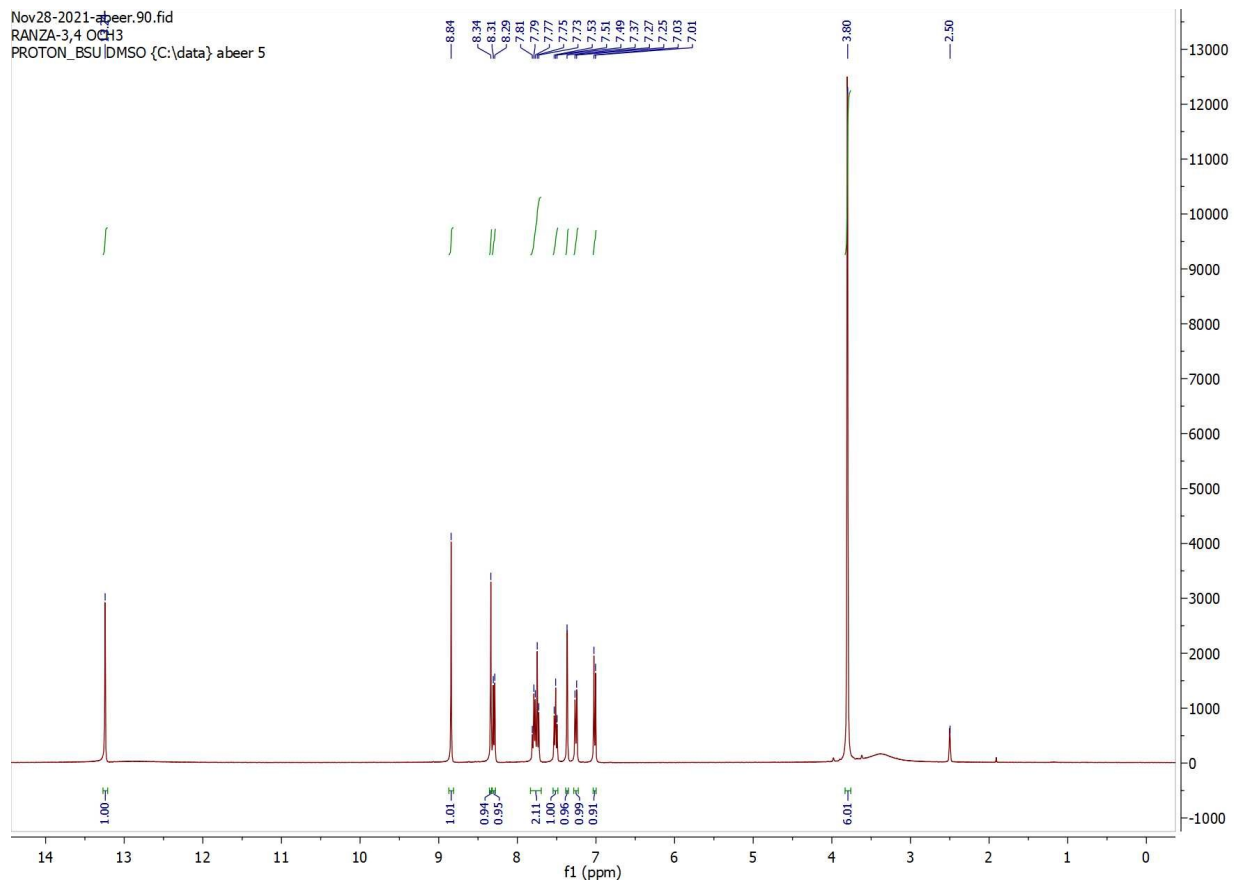

Figure 15. <sup>1</sup>H NMR of Compound 13



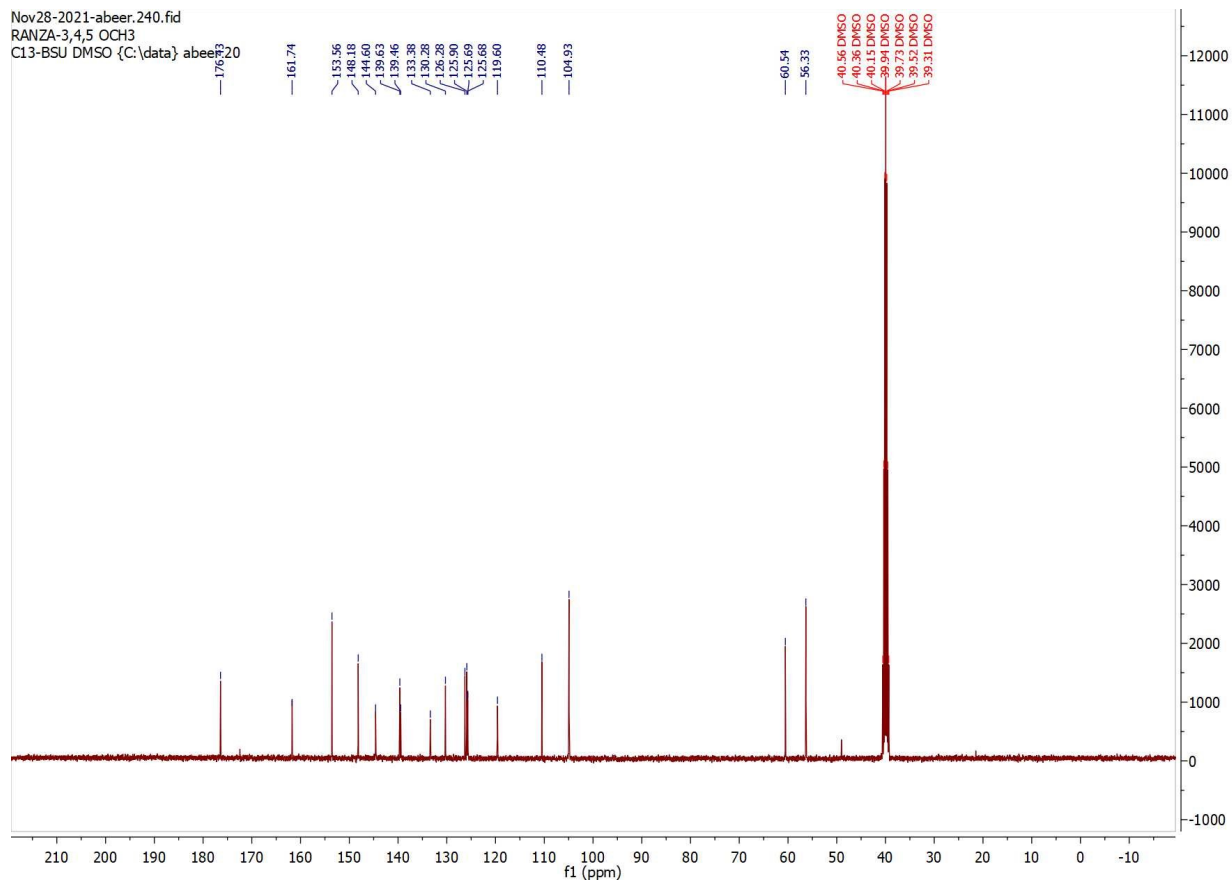

Figure 16.  $^{13}\text{C}$  NMR of Compound 13

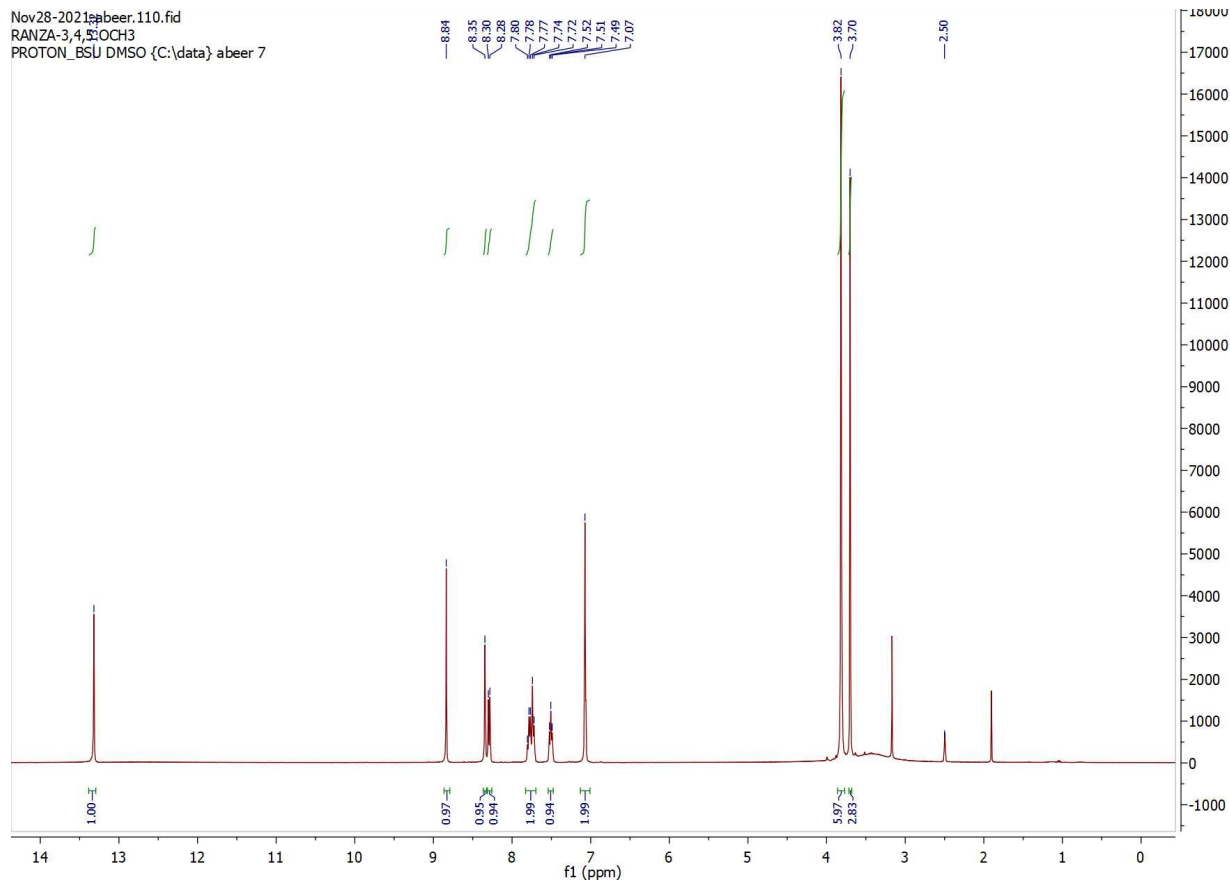

Figure 17.  $^1\text{H}$  NMR of Compound 14

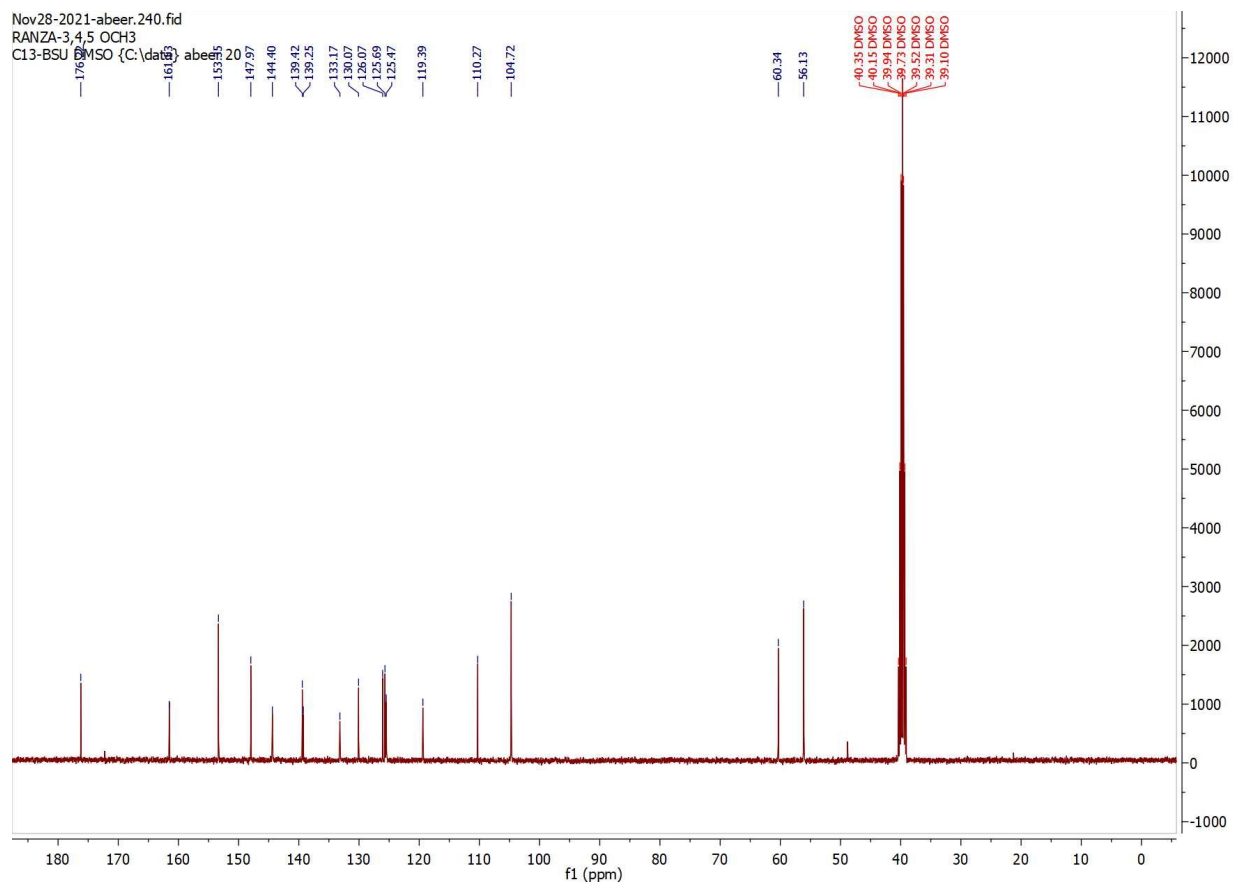

Figure 18.  $^{13}\text{C}$  NMR of Compound 14

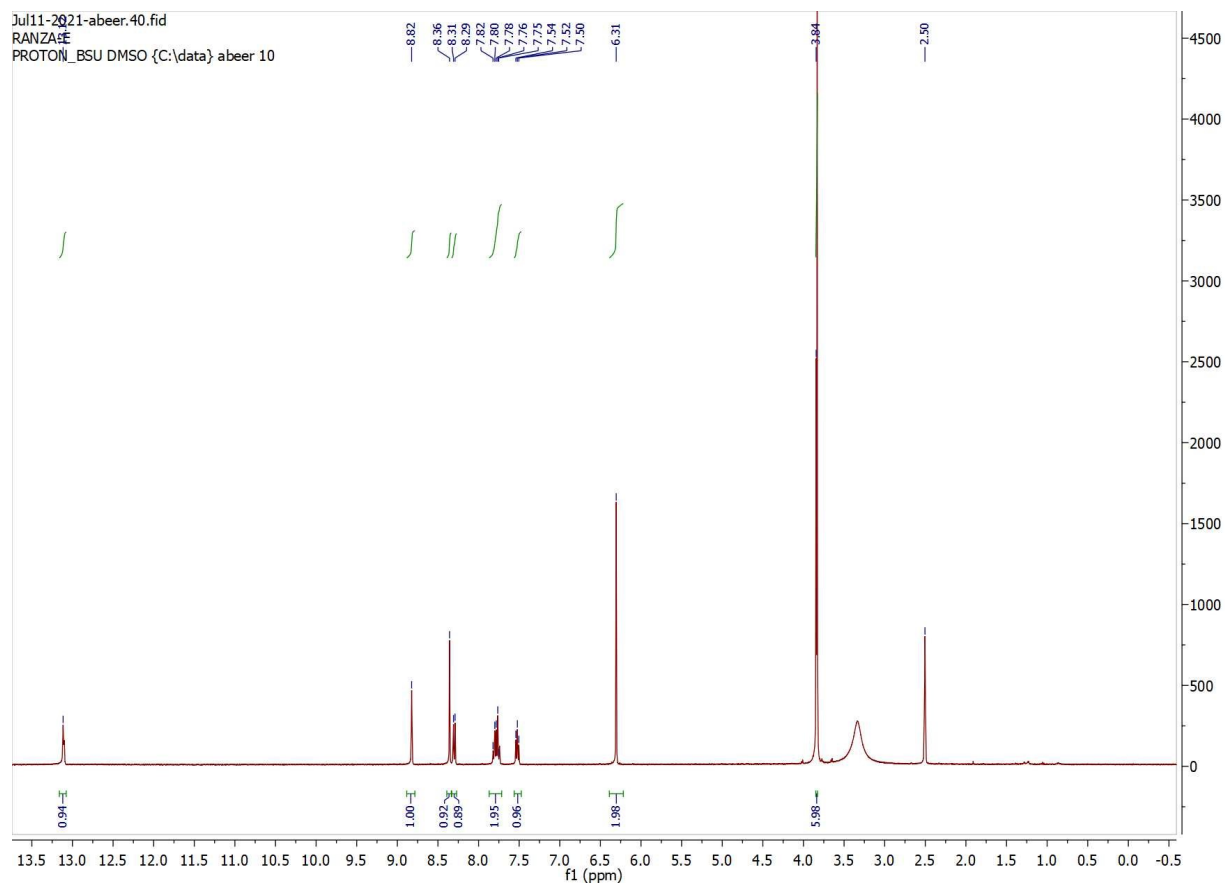

Figure 19.  $^1\text{H}$  NMR of Compound 15

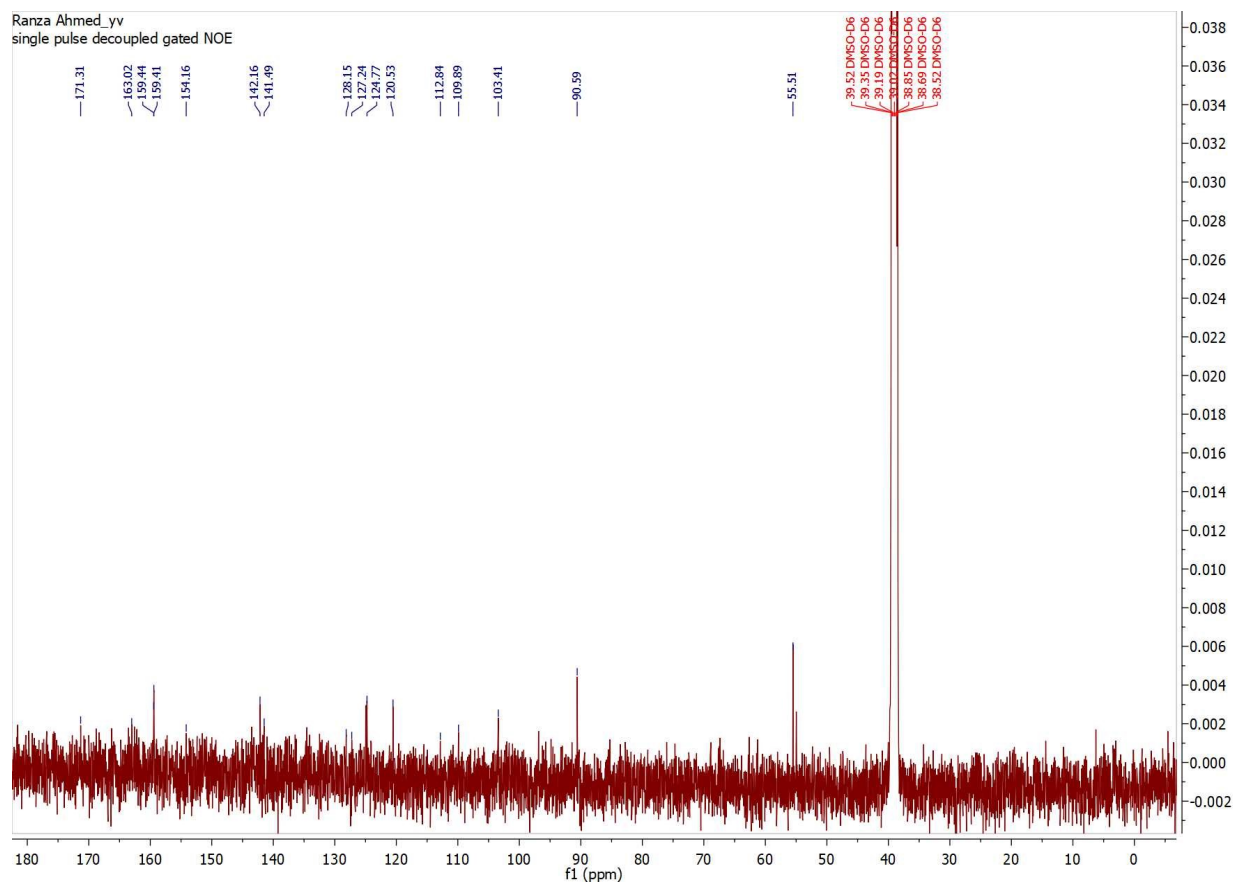

Figure 20.  $^{13}\text{C}$  NMR of Compound 15

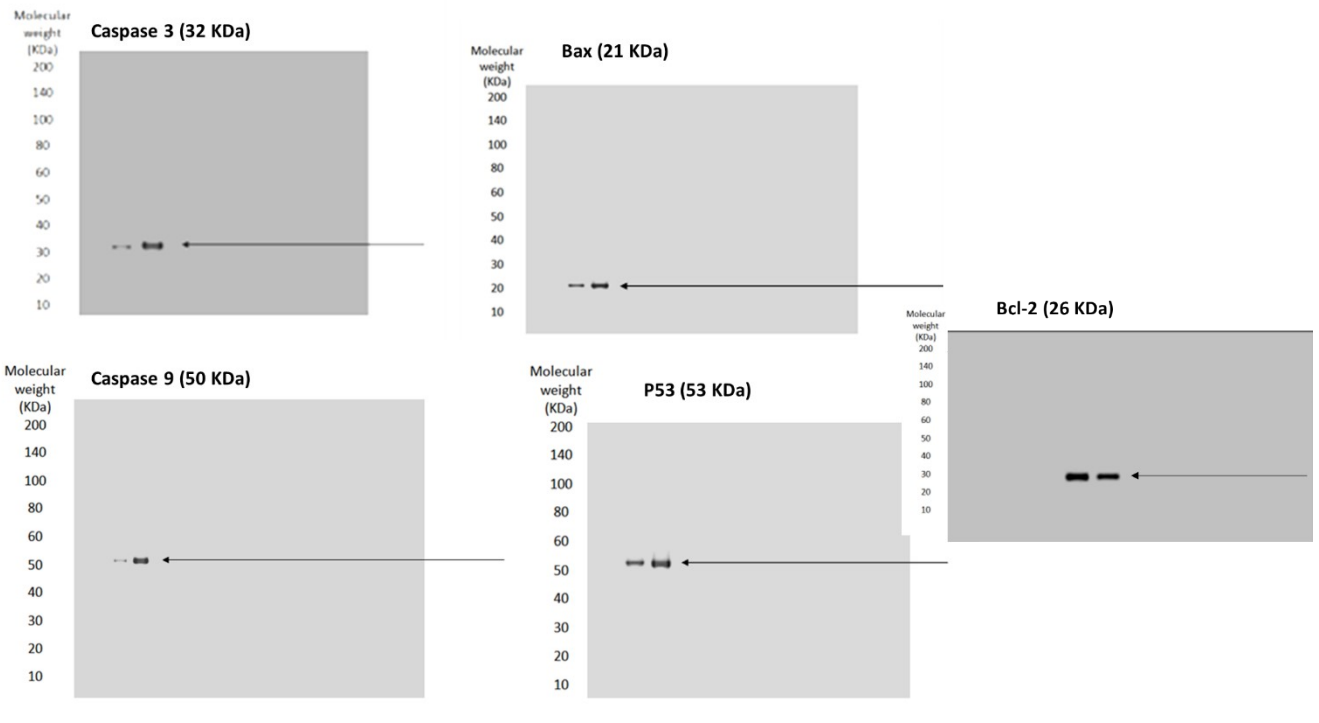

Figure 21. Western blotting images for the tested proteins

| Target             | Ligand    | MM/GBSA | Per-residue MM/GBSA energy contributions |
|--------------------|-----------|---------|------------------------------------------|
| EGFR <sup>WT</sup> | 13        | -35.94  |                                          |
|                    | 14        | -42.59  |                                          |
|                    | 15        | -42.74  |                                          |
|                    | Gefitinib | -42.88  |                                          |

|                       |    |        |                                                                                      |
|-----------------------|----|--------|--------------------------------------------------------------------------------------|
| EGFR <sup>T790M</sup> | 13 | -36.72 | 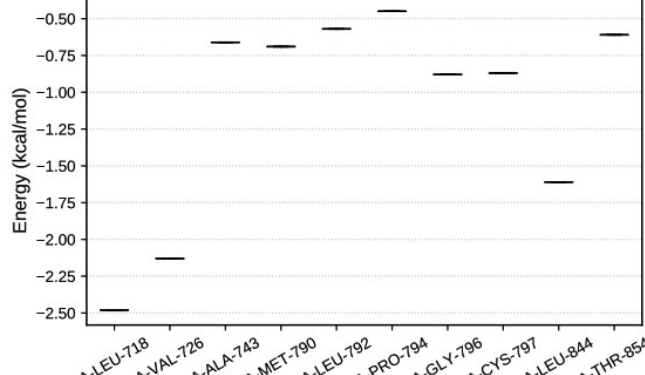   |
|                       | 14 | -59.23 |    |
|                       | 15 | -45.89 |   |
| Neratinib             |    | -74.46 |  |



|                       |    |        |                                                                                      |
|-----------------------|----|--------|--------------------------------------------------------------------------------------|
| EGFR <sup>L858R</sup> | 13 | -40.21 | 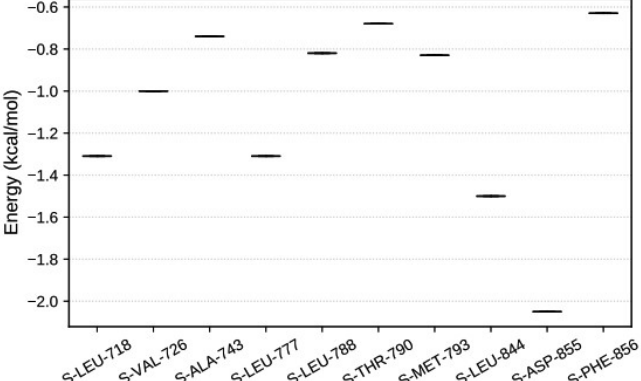   |
|                       | 14 | -49.23 |    |
|                       | 15 | -45.04 |   |
| Gefitinib             |    | -40.33 |  |
